# Supplementary material for: Distress and Spiritual Well-Being in Brazilian Patients Initiating Chemotherapy during the COVID-19 Pandemic—A Cross-Sectional Study
Source: MDPI journal article supplement (doi:10.3390/ijerph182413200), 2021-12-15
Supplement: s1 [file s1]

**Table S1.** Distribution of sociodemographic, spiritual, and clinical variables of patients starting chemotherapy in the pandemic. Rio de Janeiro, RJ, Brazil, 2021 (*n* = 91)

| Variables                                  | n           | %    |
|--------------------------------------------|-------------|------|
| Sociodemographic                           |             |      |
| Age group (years)                          |             |      |
| 20–39                                      | 15          | 16.5 |
| 40–59                                      | 35          | 38.5 |
| 60 or more                                 | 41          | 45.1 |
| Age (Years)                                |             |      |
| Mean (standard deviation)                  | 55.4 (13.9) |      |
| Minimum (maximum)                          | 21 (86)     |      |
| Sex                                        |             |      |
| Female                                     | 41          | 45.1 |
| Male                                       | 50          | 54.9 |
| Education level (years of study)           |             |      |
| Elementary school (5 years)                | 24          | 26.4 |
| Middle school (9 years)                    | 17          | 18.7 |
| High school (12 years)                     | 32          | 35.2 |
| University (>12 years)                     | 18          | 19.8 |
| Performs professional activities currently |             |      |
| Yes                                        | 35          | 38.5 |
| No                                         | 56          | 61.5 |
| Monthly income                             |             |      |
| ≤ \$192                                    | 33          | 36.3 |
| \$384-\$576                                | 44          | 48.4 |
| ≥ \$768                                    | 14          | 15.4 |
| Religiousness                              |             |      |
| Religion                                   |             |      |
| Yes                                        | 85          | 93.4 |
| No                                         | 6           | 6.6  |
| What religion                              |             |      |
| No religion                                | 6           | 6.6  |
| Catholic                                   | 44          | 48.4 |
| Evangelical                                | 35          | 38.5 |
| Umbanda                                    | 3           | 3.3  |
| Spiritist                                  | 3           | 3.3  |
| Clinical                                   |             |      |
| COVID-19 infection                         |             |      |
| Yes                                        | 7           | 7.7  |
| No                                         | 84          | 92.3 |
| Nutritional status                         |             |      |
| Low weight                                 | 9           | 9.9  |

|                                    |    |      |
|------------------------------------|----|------|
| Eutrophic                          | 34 | 37.4 |
| Overweight                         | 32 | 35.2 |
| Obesity                            | 16 | 17.6 |
| Primary tumor location             |    |      |
| Genitourinary                      | 9  | 9.9  |
| Gastrointestinal                   | 36 | 39.6 |
| Hematologic                        | 18 | 19.8 |
| Lung                               | 7  | 7.7  |
| Head and neck                      | 15 | 16.5 |
| Central nervous system             | 1  | 1.1  |
| Liver, pancreas, and biliary tract | 3  | 3.3  |
| Unknown primary site               | 2  | 2.2  |
| Cancer staging                     |    |      |
| I                                  | 2  | 2.2  |
| II                                 | 11 | 12.1 |
| III                                | 37 | 40.7 |
| IV                                 | 38 | 41.8 |
| Not defined                        | 3  | 3.3  |
| Performance status                 |    |      |
| PS-0                               | 16 | 17.6 |
| PS-1                               | 52 | 57.1 |
| PS-2                               | 23 | 25.3 |
| Type of treatment                  |    |      |
| Curative                           | 16 | 17.6 |
| Adjuvant                           | 11 | 12.1 |
| Neoadjuvant                        | 26 | 28.6 |
| Palliative                         | 38 | 41.8 |
| Year of diagnosis                  |    |      |
| 2013                               | 1  | 1.1  |
| 2017                               | 2  | 2.2  |
| 2018                               | 2  | 2.2  |
| 2019                               | 2  | 2.2  |
| 2020                               | 48 | 52.7 |
| 2021                               | 36 | 39.6 |
| Diagnosis during the pandemic      |    |      |
| No                                 | 7  | 7.7  |
| Yes                                | 84 | 92.3 |
| Concurrent treatment               |    |      |
| No                                 | 70 | 76.9 |
| Hormone therapy                    | 4  | 4.4  |
| Radiotherapy                       | 17 | 18.7 |
| Use of psychotropic drugs          |    |      |
| Yes                                | 26 | 28.6 |

|                                       |               |      |
|---------------------------------------|---------------|------|
| No                                    | 65            | 71.4 |
| Visual Analogue Scale (VAS)           |               |      |
| Pain                                  |               |      |
| Yes                                   | 23            | 25.3 |
| No                                    | 68            | 74.7 |
| Pain intensity                        |               |      |
| Mild (0–2)                            | 72            | 79.1 |
| Moderate (3–7)                        | 18            | 19.8 |
| Severe (8–10)                         | 1             | 1.1  |
| VAS score                             |               |      |
| Mean (standard deviation)             | 1.11 (2.13)   |      |
| Minimum (maximum)                     | 0 (9)         |      |
| Distress Thermometer (DT)             |               |      |
| Distress                              |               |      |
| Yes (DT≥ 4)                           | 45            | 49.5 |
| No (DT<4)                             | 46            | 50.5 |
| DT score                              |               |      |
| Mean (standard deviation)             | 3.81 (3.46)   |      |
| Minimum (maximum)                     | 0 (10)        |      |
| Spiritual Well-Being Scale            |               |      |
| Religious well-being subscale score   |               |      |
| Mean (standard deviation )            | 57.87 (4.00)  |      |
| Minimum (maximum)                     | 43 (60)       |      |
| Existential well-being subscale score |               |      |
| Mean (standard deviation )            | 48.67 (7.03)  |      |
| Minimum (maximum)                     | 30(60)        |      |
| Total score                           |               |      |
| Mean (standard deviation )            | 106.54 (9.06) |      |
| Minimum (maximum)                     | 75.00 (120)   |      |

**Table S2.** Distribution of problems according to the Distress Thermometer and Problem List for Patients classification, and significance of differences between patients with and without distress starting chemotherapy in the pandemic. Rio de Janeiro, Brazil, 2021, ( $n = 91$ )

| Variables           | No distress |      | Distress |      | Total |      | p-value              |
|---------------------|-------------|------|----------|------|-------|------|----------------------|
|                     | n           | %    | n        | %    | n     | %    |                      |
| Practical problems  |             |      |          |      |       |      |                      |
| Child care          |             |      |          |      |       |      |                      |
| Yes                 | 11          | 23.9 | 12       | 26.7 | 23    | 25.3 | 0.763 <sup>(1)</sup> |
| No                  | 35          | 76.1 | 33       | 73.3 | 68    | 74.7 |                      |
| Housing             |             |      |          |      |       |      |                      |
| Yes                 | 16          | 34.8 | 16       | 35.6 | 32    | 35.2 | 0.930 <sup>(1)</sup> |
| No                  | 30          | 65.2 | 29       | 64.4 | 59    | 64.8 |                      |
| Insurance/financial |             |      |          |      |       |      |                      |

|                                      |    |      |    |      |    |      |                        |
|--------------------------------------|----|------|----|------|----|------|------------------------|
| Yes                                  | 21 | 45.7 | 26 | 57.8 | 47 | 51.7 | 0.247 <sup>(1)</sup>   |
| No                                   | 25 | 54.4 | 19 | 42.2 | 44 | 48.4 |                        |
| Transportation                       |    |      |    |      |    |      |                        |
| Yes                                  | 23 | 50   | 20 | 44.4 | 43 | 47.3 | 0.595 <sup>(2)</sup>   |
| No                                   | 23 | 50   | 25 | 55.6 | 48 | 52.8 |                        |
| Work/school                          |    |      |    |      |    |      |                        |
| Yes                                  | 21 | 45.7 | 24 | 53.3 | 45 | 49.5 | 0.460 <sup>(1)</sup>   |
| No                                   | 25 | 54.4 | 21 | 46.7 | 46 | 50.6 |                        |
| Family problems                      |    |      |    |      |    |      |                        |
| Children                             |    |      |    |      |    |      |                        |
| Yes                                  | 2  | 4.4  | 6  | 13.3 | 8  | 8.8  | 0.130 <sup>(1)</sup>   |
| No                                   | 44 | 95.7 | 39 | 86.7 | 83 | 91.2 |                        |
| Partner                              |    |      |    |      |    |      |                        |
| Yes                                  | 1  | 2.2  | 8  | 17.8 | 9  | 9.9  | 0.032 <sup>(2)</sup> * |
| No                                   | 45 | 97.8 | 37 | 82.2 | 82 | 90.1 |                        |
| Emotional problem                    |    |      |    |      |    |      |                        |
| Depression                           |    |      |    |      |    |      |                        |
| Yes                                  | 6  | 13.0 | 17 | 37.8 | 23 | 25.3 | 0.006 <sup>(3)</sup> * |
| No                                   | 40 | 87.0 | 28 | 62.2 | 68 | 74.7 |                        |
| Fears                                |    |      |    |      |    |      |                        |
| Yes                                  | 12 | 26.1 | 23 | 51.1 | 35 | 38.5 | 0.014 <sup>(3)</sup> * |
| No                                   | 34 | 73.9 | 22 | 48.9 | 56 | 61.5 |                        |
| Nervousness                          |    |      |    |      |    |      |                        |
| Yes                                  | 22 | 47.8 | 29 | 64.4 | 51 | 56.0 | 0.167 <sup>(2)</sup>   |
| No                                   | 24 | 52.2 | 16 | 35.6 | 40 | 44.0 |                        |
| Sadness                              |    |      |    |      |    |      |                        |
| Yes                                  | 15 | 32.6 | 29 | 64.4 | 44 | 48.4 | 0.002 <sup>(3)</sup> * |
| No                                   | 31 | 67.4 | 16 | 35.6 | 47 | 51.7 |                        |
| Worry                                |    |      |    |      |    |      |                        |
| Yes                                  | 28 | 60.9 | 40 | 88.9 | 68 | 74.7 | 0.002 <sup>(1)</sup> * |
| No                                   | 18 | 39.1 | 5  | 11.1 | 23 | 25.3 |                        |
| Loss of interest in usual activities |    |      |    |      |    |      |                        |
| Yes                                  | 21 | 46.7 | 14 | 31.1 | 35 | 38.5 | 0.154 <sup>(1)</sup>   |
| No                                   | 25 | 55.6 | 31 | 68.9 | 56 | 61.5 |                        |
| Spiritual/religious concerns         |    |      |    |      |    |      |                        |
| Yes                                  | 12 | 26.1 | 11 | 24.4 | 23 | 25.3 | 0.857 <sup>(1)</sup>   |
| No                                   | 34 | 73.9 | 34 | 75.6 | 68 | 74.7 |                        |
| Physical problems                    |    |      |    |      |    |      |                        |
| Appearance                           |    |      |    |      |    |      |                        |
| Yes                                  | 11 | 23.9 | 11 | 24.4 | 22 | 24.2 | 0.953 <sup>(1)</sup>   |
| No                                   | 35 | 76.1 | 34 | 75.6 | 69 | 75.8 |                        |
| Bathing/dressing                     |    |      |    |      |    |      |                        |

|                      |    |      |    |      |    |      |                        |
|----------------------|----|------|----|------|----|------|------------------------|
| Yes                  | 3  | 6.5  | 4  | 8.9  | 7  | 7.7  | 0.714 <sup>(3)</sup>   |
| No                   | 43 | 93.5 | 41 | 91.1 | 84 | 92.3 |                        |
| Breathing            |    |      |    |      |    |      |                        |
| Yes                  | 13 | 28.3 | 14 | 31.1 | 27 | 29.7 | 0.766 <sup>(1)</sup>   |
| No                   | 33 | 71.7 | 31 | 68.9 | 64 | 70.3 |                        |
| Changes in urination |    |      |    |      |    |      |                        |
| Yes                  | 12 | 26.1 | 12 | 26.7 | 24 | 26.4 | 0.004 <sup>(1)</sup> * |
| No                   | 34 | 73.9 | 33 | 73.3 | 67 | 73.6 |                        |
| Constipation         |    |      |    |      |    |      |                        |
| Yes                  | 13 | 28.3 | 16 | 35.6 | 29 | 31.9 | 0.455 <sup>(1)</sup>   |
| No                   | 33 | 71.7 | 29 | 64.4 | 62 | 68.1 |                        |
| Diarrhea             |    |      |    |      |    |      |                        |
| Yes                  | 7  | 15.2 | 12 | 26.7 | 19 | 20.9 | 0.250 <sup>(2)</sup>   |
| No                   | 39 | 84.8 | 33 | 73.3 | 72 | 79.1 |                        |
| Eating               |    |      |    |      |    |      |                        |
| Yes                  | 18 | 39.1 | 9  | 20   | 27 | 29.7 | 0.046 <sup>(1)</sup> * |
| No                   | 28 | 60.9 | 36 | 80   | 64 | 70.3 |                        |
| Fatigue              |    |      |    |      |    |      |                        |
| Yes                  | 15 | 32.6 | 15 | 33.3 | 30 | 33.0 | 0.941 <sup>(1)</sup>   |
| No                   | 31 | 67.4 | 30 | 66.7 | 61 | 67.0 |                        |
| Feeling swollen      |    |      |    |      |    |      |                        |
| Yes                  | 10 | 21.7 | 11 | 24.4 | 21 | 23.1 | 0.759 <sup>(1)</sup>   |
| No                   | 36 | 78.3 | 34 | 75.6 | 70 | 76.9 |                        |
| Fevers               |    |      |    |      |    |      |                        |
| Yes                  | 4  | 8.7  | 1  | 2.2  | 5  | 5.5  | 0.161 <sup>(2)</sup>   |
| No                   | 42 | 91.3 | 44 | 97.8 | 86 | 94.5 |                        |
| Getting around       |    |      |    |      |    |      |                        |
| Yes                  | 9  | 19.6 | 12 | 26.7 | 21 | 23.1 | 0.421 <sup>(1)</sup>   |
| No                   | 37 | 80.4 | 33 | 73.3 | 70 | 76.9 |                        |
| Indigestion          |    |      |    |      |    |      |                        |
| Yes                  | 5  | 10.9 | 11 | 24.4 | 16 | 17.6 | 0.089 <sup>(1)</sup>   |
| No                   | 41 | 89.1 | 34 | 75.6 | 75 | 82.4 |                        |
| Memory/concentration |    |      |    |      |    |      |                        |
| Yes                  | 14 | 30.4 | 14 | 31.1 | 28 | 30.8 | 0.940 <sup>(1)</sup>   |
| No                   | 32 | 69.6 | 31 | 68.9 | 63 | 69.2 |                        |
| Mouth sores          |    |      |    |      |    |      |                        |
| Yes                  | 3  | 6.5  | 4  | 8.9  | 7  | 7.7  | 0.672 <sup>(1)</sup>   |
| No                   | 43 | 93.5 | 41 | 91.1 | 84 | 92.3 |                        |
| Nausea               |    |      |    |      |    |      |                        |
| Yes                  | 11 | 23.9 | 8  | 17.8 | 19 | 20.9 | 0.472 <sup>(1)</sup>   |
| No                   | 35 | 76.1 | 37 | 82.2 | 72 | 79.1 |                        |
| Nose dry/congested   |    |      |    |      |    |      |                        |

|                        |    |      |    |      |    |      |                      |
|------------------------|----|------|----|------|----|------|----------------------|
| Yes                    | 10 | 21.7 | 7  | 15.6 | 17 | 18.7 | 0.449 <sup>(1)</sup> |
| No                     | 36 | 78.3 | 38 | 84.4 | 74 | 81.3 |                      |
| Pain                   |    |      |    |      |    |      |                      |
| Yes                    | 21 | 45.7 | 20 | 44.4 | 41 | 45.1 | 0.908 <sup>(1)</sup> |
| No                     | 25 | 54.4 | 25 | 55.6 | 50 | 55.0 |                      |
| Sexual                 |    |      |    |      |    |      |                      |
| Yes                    | 10 | 21.7 | 13 | 28.9 | 23 | 25.3 | 0.433 <sup>(1)</sup> |
| No                     | 36 | 78.3 | 32 | 71.1 | 68 | 74.7 |                      |
| Skin dry/itchy         |    |      |    |      |    |      |                      |
| Yes                    | 11 | 23.9 | 16 | 35.6 | 27 | 29.7 | 0.224 <sup>(1)</sup> |
| No                     | 35 | 76.1 | 29 | 64.4 | 64 | 70.3 |                      |
| Sleep                  |    |      |    |      |    |      |                      |
| Yes                    | 19 | 41.3 | 23 | 51.1 | 42 | 46.2 | 0.348 <sup>(1)</sup> |
| No                     | 27 | 58.7 | 22 | 48.9 | 49 | 53.9 |                      |
| Tingling in hands/feet |    |      |    |      |    |      |                      |
| Yes                    | 9  | 20.0 | 13 | 28.9 | 22 | 24.2 | 0.229 <sup>(1)</sup> |
| No                     | 37 | 82.2 | 32 | 71.1 | 69 | 75.8 |                      |

<sup>(1)</sup> Chi-square; <sup>(2)</sup> likelihood ratio; <sup>(3)</sup> Fisher's exact test; \*  $p \leq 0.05$  (statistically significant)
